# Supplementary material
Source: Springer Nature journal article supplement (https://www.springermedizin.de/resource/supplementary/12874_2010_516_MOESM2_ESM.pdf/9432434)

Limitations  
of technical design

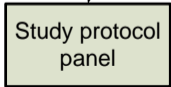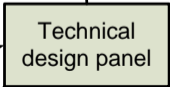

Study protocol

Technical design

Conform with  
therapy routines

Conform with  
therapy content

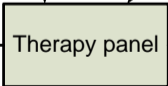

Supplement: MOESM2 [file 9432434]
